# Supplementary material for: Beneficial effect of Pd and MWCNT co-loading in SnO2 nanoparticles towards the low temperature detection of n-butane gas: synergistic effect on sensing performance
Source: Royal Society of Chemistry journal article supplement (doi:10.1039/d3sd00056g), 2023-01-01

**Beneficial effect of Pd and MWCNT co-doping in SnO<sub>2</sub> nanoparticles towards low temperature detection of butane gas: Synergistic effect on sensing performance**

**P. Rana<sup>#</sup>, M. Narjinary, A. Sen and M. Pal<sup>\*</sup>**

Functional Materials & Devices Division  
CSIR-Central Glass & Ceramic Research Institute, 196, Raja S.C. Mullick Road, Jadavpur, Kolkata-700 032, West Bengal, India.  
E-mail: [palm@cgcri.res.in](mailto:palm@cgcri.res.in)

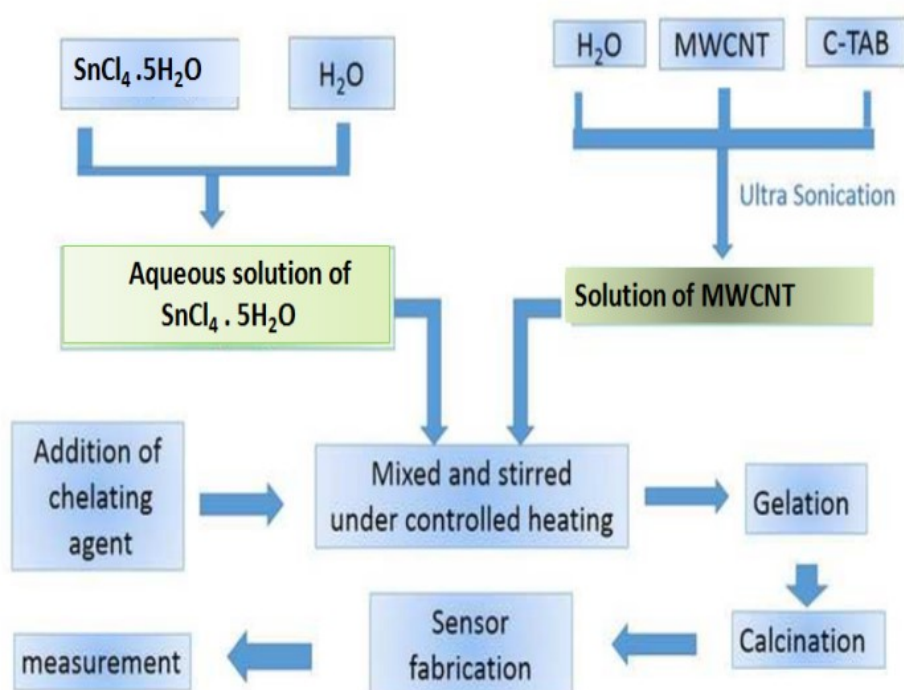

**Fig. S1** :Schematic of sample preparation procedure

**Table S1:** Sensing performance of synthesized materials for 2000 ppm butane at 300° C.

| Sample description           | Sensitivity (%) | Responsetime (s) | Recoverytime (s) |
|------------------------------|-----------------|------------------|------------------|
| SnO <sub>2</sub>             | 34              | 9                | 14               |
| SnO <sub>2</sub> + MWCNT     | 35              | 14               | 16               |
| SnO <sub>2</sub> + Pd        | 65              | 10               | 25               |
| SnO <sub>2</sub> + MWCNT+ Pd | 93              | 1                | 10               |

**Fig. S2:** log(S) vs. log(C) plot of SnO<sub>2</sub>-CNT-Pd sensor

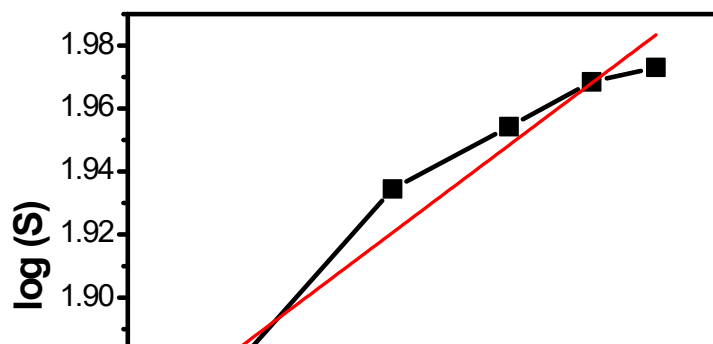

Supplement: d3sd00056g1.pdf [file d3sd00056g1.pdf]
